# Supplementary material for: Peripheral Nerve Sheath Tumors Resembling Human Atypical Neurofibroma in Goldfish (Carassius auratus, Linnaeus, 1758)
Source: MDPI journal article supplement (doi:10.3390/ani11092621), 2021-09-07
Supplement: s1 [file s1]

**Supplementary Table S1.** The host species and clonality of each tested primary antibody, as well as the corresponding antigen retrieval, serum blocking, dilution, secondary antibody, and both goldfish and canine positive controls used, are reported.

| Primary antibody                             | Host species, clonality                      | Antigen retrieval                            | Serum blocking | Dilution | Secondary antibody (1:200) | Positive control - goldfish tissue     | Positive control - canine tissue |
|----------------------------------------------|----------------------------------------------|----------------------------------------------|----------------|----------|----------------------------|----------------------------------------|----------------------------------|
| $\alpha$ -SMA *<br>(Dako – M 0831)           | Mouse, monoclonal (clone 1A4), anti-human    | n/a                                          | Goat serum     | 1:200    | GaM-b                      | Gastrointestinal tract                 | Intestine                        |
| c-Kit/CD117<br>(Dako – A4502)                | Rabbit, polyclonal, anti-human               | Citrate buffer,<br>microwave<br>(800 W, 20') | Goat serum     | 1:100    | GaR-b                      | Kidney – hematopoietic precursor cells | MCT                              |
| Calretinin<br>(Synaptic systems – 214 102)   | Rabbit, polyclonal, anti-mouse               | Citrate buffer,<br>microwave<br>(800 W, 20') | Goat serum     | 1:500    | GaR-b                      | Peripheral nerve                       | Schwannoma                       |
| Chromogranin-A *<br>(Dako - M 0869)          | Mouse, monoclonal (clone DAK-A3), anti-human | Citrate buffer,<br>microwave<br>(800 W, 20') | Goat serum     | 1:100    | GaM-b                      | Pancreas – endocrine islets            | Pancreas                         |
| CNPase<br>(Chemicon International – MAB 326) | Mouse, monoclonal (clone 11-5B), anti-human  | Citrate buffer,<br>microwave<br>(800 W, 20') | Goat serum     | 1:100    | GaM-b                      | Brain and peripheral nerve             | Brain                            |
| Desmin *<br>(Dako – M0760)                   | Mouse, monoclonal (clone D33), anti-human    | n/a                                          | Goat serum     | 1:100    | GaM-b                      | Gastrointestinal tract                 | Intestine                        |
| GFAP<br>(Dako – Z0334)                       | Rabbit, polyclonal, anti-bovine              | n/a                                          | Goat serum     | 1:1000   | GaR-b                      | Brain                                  | Brain                            |

Supplementary Table S1 cont.

| Primary antibody                                  | Host species, clonality                             | Antigen retrieval                      | Serum blocking | Dilution | Secondary antibody (1:200) | Positive control - goldfish tissue | Positive control - canine tissue |
|---------------------------------------------------|-----------------------------------------------------|----------------------------------------|----------------|----------|----------------------------|------------------------------------|----------------------------------|
| Ki-67 *<br>(Dako – M7240)                         | Mouse, monoclonal (clone MIB-1), anti-human         | Citrate buffer, microwave (800 W, 20') | Goat serum     | 1:100    | GaM-b                      | Gastrointestinal tract             | Tonsil and lymph node            |
| EGR2/KROX-20<br>(LS Bio – LS-B3577)               | Rabbit, polyclonal, anti-human                      | Citrate buffer, microwave (800 W, 20') | Goat serum     | 1:500    | GaR-b                      | Peripheral nerve                   | Peripheral nerve                 |
| Melan A *<br>(Dako – M7196)                       | Mouse, monoclonal (clone A103), anti-human          | Citrate buffer, microwave (800 W, 20') | Goat serum     | 1:250    | GaM-b                      | Eye                                | Melanoma                         |
| n-NF<br>(Sternberger SMI <sup>®</sup> - SMI-311R) | Mouse, monoclonal (clone SMI 311), anti-rat         | Citrate buffer, microwave (800 W, 20') | Goat serum     | 1:1000   | GaM-b                      | Brain and peripheral nerve         | Brain and peripheral nerve       |
| NSE *<br>(Dako - M 0873)                          | Mouse, monoclonal (clone BBS/NC/VI-H14), anti-human | n/a                                    | Goat serum     | 1:100    | GaM-b                      | Brain and peripheral nerve         | Brain and peripheral nerve       |
| p-NF<br>(Sternberger SMI <sup>®</sup> - SMI-312R) | Mouse, monoclonal (clone SMI 312), anti-rat         | n/a                                    | Goat serum     | 1:4000   | GaM-b                      | Brain and peripheral nerve         | Brain and peripheral nerve       |
| PRX *<br>(Sigma – HPA001868)                      | Rabbit, polyclonal, anti-human                      | Citrate buffer, microwave (800 W, 20') | Goat serum     | 1:2000   | GaR-b                      | Brain and peripheral nerve         | Brain and peripheral nerve       |

Supplementary Table S1 cont.

| Primary antibody                               | Host species, clonality                         | Antigen retrieval                            | Serum blocking | Dilution | Secondary antibody (1:200) | Positive control - goldfish tissue | Positive control - canine tissue |
|------------------------------------------------|-------------------------------------------------|----------------------------------------------|----------------|----------|----------------------------|------------------------------------|----------------------------------|
| PNL-2<br>(Santa Cruz – SC-59306)               | Mouse, monoclonal (clone PNL2), anti-Human      | Citrate buffer,<br>microwave<br>(800 W, 20') | Goat serum     | 1:500    | GaM-b                      | Eye                                | Melanoma                         |
| p75 <sup>NTR</sup> /NGFR *<br>(ATCC – hb-8737) | Mouse, monoclonal (clone HB8737), anti-human    | n/a                                          | Goat serum     | 1:5      | GaM-b                      | Brain and peripheral nerve         | Brain and peripheral nerve       |
| SOX2<br>(Cell Signaling Technology - #3579)    | Rabbit IgG, monoclonal (clone D6D9), anti-human | Citrate buffer,<br>microwave<br>(800 W, 20') | Goat serum     | 1:50     | GaR-b                      | Brain and peripheral nerve         | PNST                             |
| Synaptophysin *<br>(Dako – M7315)              | Mouse, monoclonal (clone DAK-SYNAP), anti-human | Citrate buffer,<br>microwave<br>(800 W, 20') | Goat serum     | 1:500    | GaM-b                      | Brain and peripheral nerve         | Brain and peripheral nerve       |
| S100<br>(Sigma – S2644)                        | Rabbit, polyclonal, anti-bovine                 | n/a                                          | Goat serum     | 1:800    | GaR-b                      | Brain and peripheral nerve         | Brain and peripheral nerve       |
| Vimentin *<br>(Dako - M0725)                   | Mouse, monoclonal (clone V9), anti-porcine      | n/a                                          | Goat serum     | 1:100    | GaM-b                      | Gastrointestinal tract             | Intestine                        |

Legend:  $\alpha$ -SMA,  $\alpha$ -smooth muscle actin; CNPase, 2',3'-Cyclic-nucleotide-phosphodiesterase; GaM-b, goat anti-mouse biotinylated; GaR-b, goat anti-rabbit biotinylated; GFAP, glial fibrillary acidic protein; MCT, mast cell tumor; n/a, non applied or non applicable; n-NF, non-phosphorylated neurofilament; NSE, neuron-specific enolase; NGFR, nerve growth factor receptor; p-NF, phosphorylated neurofilament; PNST, peripheral nerve sheath tumor; PRX, periaxin; W, Watt.

\* These antibodies did not exhibit the expected cross-reaction with the proper tissue(s) from the control goldfish and were therefore not tested on sections of the nodules.

**Supplementary Table S2.** Overview on the cytological features of cutaneous nodules from 6 goldfish (*Carassius auratus*).

| CASE ID | Overview                 |                                      |                                                 | Type of cells <sup>d</sup> | Atypical cells                           | Cytoplasm <sup>f</sup> | Nucleus <sup>g</sup>           | Anisocytosis and anisokaryosis <sup>a</sup> |                      |                                                   |
|---------|--------------------------|--------------------------------------|-------------------------------------------------|----------------------------|------------------------------------------|------------------------|--------------------------------|---------------------------------------------|----------------------|---------------------------------------------------|
|         | Cellularity <sup>a</sup> | Extracellular matrix <sup>b, c</sup> | Extracellular red-pinkish granules <sup>c</sup> |                            | Shape                                    | Adhesion               | Red/pink Granules <sup>c</sup> |                                             | Shape                | Binucleated and multinucleated cells <sup>c</sup> |
|         |                          |                                      |                                                 |                            | (max diameter)                           | <sup>e</sup>           |                                |                                             | (max diameter)       |                                                   |
| #1      | ++                       | +++                                  | +++                                             | Atypical cells (70%)       | Spindle to polygonal (55 μm)             | S/LC                   | ++/+++                         | Round to oval (28 μm)                       | +/++                 | ++                                                |
|         |                          |                                      |                                                 | Macrophages (10%)          |                                          |                        |                                |                                             |                      |                                                   |
|         |                          |                                      |                                                 | Epithelial cells (10%)     |                                          |                        |                                |                                             |                      |                                                   |
|         |                          |                                      |                                                 | Melanophores (5%)          |                                          |                        |                                |                                             |                      |                                                   |
|         |                          |                                      |                                                 | Lymphocytes (5%)           |                                          |                        |                                |                                             |                      |                                                   |
| #2      | ++                       | +                                    | +                                               | Epithelial cells (85%)     | Spindle (45 μm)                          | LC                     | +                              | Oval (25 μm)                                | -                    | +                                                 |
|         |                          |                                      |                                                 | Macrophages (7%)           |                                          |                        |                                |                                             |                      |                                                   |
|         |                          |                                      |                                                 | Atypical cells (5%)        |                                          |                        |                                |                                             |                      |                                                   |
|         |                          |                                      |                                                 | Lymphocytes (3%)           |                                          |                        |                                |                                             |                      |                                                   |
| #3      | +++                      | +                                    | +                                               | Epithelial cells (30%)     | Spindle to polygonal to roundish (40 μm) | S                      | +                              | Round to oval (26 μm)                       | + (only binucleated) | +                                                 |
|         |                          |                                      |                                                 | Macrophages (30%)          |                                          |                        |                                |                                             |                      |                                                   |
|         |                          |                                      |                                                 | Lymphocytes (20%)          |                                          |                        |                                |                                             |                      |                                                   |
|         |                          |                                      |                                                 | Neutrophils (10%)          |                                          |                        |                                |                                             |                      |                                                   |
|         |                          |                                      |                                                 | Atypical cells (10%)       |                                          |                        |                                |                                             |                      |                                                   |
| #4      | +++                      | +                                    | +                                               | Epithelial cells (80%)     | Spindle (50 μm)                          | S/LC                   | +/++                           | Round (28 μm)                               | -                    | +                                                 |
|         |                          |                                      |                                                 | Atypical cells (15%)       |                                          |                        |                                |                                             |                      |                                                   |
|         |                          |                                      |                                                 | Lymphocytes (3%)           |                                          |                        |                                |                                             |                      |                                                   |
|         |                          |                                      |                                                 | Macrophages (2%)           |                                          |                        |                                |                                             |                      |                                                   |

Supplementary Table S2 cont.

| CASE<br>ID | Overview                    |                                         |                                                     | Type of cells <sup>d</sup> | Atypical cells                                        |                              | Cytoplasm <sup>f</sup>                |                                     | Nucleus <sup>g</sup>                                 |    | Anisocytosis and<br>anisokaryosis <sup>a</sup> |
|------------|-----------------------------|-----------------------------------------|-----------------------------------------------------|----------------------------|-------------------------------------------------------|------------------------------|---------------------------------------|-------------------------------------|------------------------------------------------------|----|------------------------------------------------|
|            | Cellularity<br><sup>a</sup> | Extracellular<br>matrix <sup>b, c</sup> | Extracellular red-<br>pinkish granules <sup>c</sup> |                            | Shape<br><br>(max diameter)                           | Adhesion<br><br><sup>e</sup> | Red/pink<br><br>Granules <sup>c</sup> | Shape<br><br>(max<br>diameter)      | Binucleated and<br>multinucleated cells <sup>c</sup> |    |                                                |
|            |                             |                                         |                                                     |                            |                                                       |                              |                                       |                                     |                                                      |    |                                                |
| #5         | ++                          | ++                                      | +                                                   | Epithelial cells (75%)     | Spindle to polygonal<br><br>(50 μm)                   | S/LC                         | + / ++                                | Round to<br><br>oval<br><br>(25 μm) | -                                                    | +  |                                                |
|            |                             |                                         |                                                     | Atypical cells (15%)       |                                                       |                              |                                       |                                     |                                                      |    |                                                |
|            |                             |                                         |                                                     | Macrophages (7%)           |                                                       |                              |                                       |                                     |                                                      |    |                                                |
|            |                             |                                         |                                                     | Lymphocytes (3%)           |                                                       |                              |                                       |                                     |                                                      |    |                                                |
| #6         | ++                          | +++                                     | +++                                                 | Atypical cells (70%)       | Spindle to polygonal<br><br>o roundish<br><br>(45 μm) | S/LC                         | + / ++                                | Round to<br><br>oval<br><br>(26 μm) | ++                                                   | ++ |                                                |
|            |                             |                                         |                                                     | Epithelial cells (15%)     |                                                       |                              |                                       |                                     |                                                      |    |                                                |
|            |                             |                                         |                                                     | Macrophages (10%)          |                                                       |                              |                                       |                                     |                                                      |    |                                                |
|            |                             |                                         |                                                     | Lymphocytes (5%)           |                                                       |                              |                                       |                                     |                                                      |    |                                                |

<sup>a</sup> +, low/mild; ++, moderate; +++, high/marked

<sup>b</sup> Composed by a meshwork of finely fibrillar, compact, pinkish extracellular material

<sup>c</sup> -, none/absent; +, scant/occasional; ++, moderately abundant/moderately numerous; +++, abundant/numerous

<sup>d</sup> Semiquantitative evaluation

<sup>e</sup> S, single and sparse; LC, loosely cohesive

<sup>f</sup> In all cases, the cytoplasm was moderately abundant, homogeneous, and light bluish

<sup>g</sup> In all cases, the nucleus was centrally located, with stippled to reticular chromatin and no evident nucleoli

**Supplementary Table S3.** Overview on the histological features of cutaneous nodules from 6 goldfish (*Carassius auratus*).

| CASE<br>ID | Growth pattern <sup>a</sup>  |                              | Maximal<br>cell size<br>(µm) | Nucleus             |                                  | Atypia <sup>c</sup>                                      |                                |                                      |                                                                           | Additional features              |                                 | Overlying epidermis             |                                           |
|------------|------------------------------|------------------------------|------------------------------|---------------------|----------------------------------|----------------------------------------------------------|--------------------------------|--------------------------------------|---------------------------------------------------------------------------|----------------------------------|---------------------------------|---------------------------------|-------------------------------------------|
|            | Rosettes<br><br><sup>b</sup> | Myxoid<br>areas <sup>b</sup> |                              | Maximum<br>diameter | Indentations<br><br><sup>b</sup> | Anisocytosis<br>and<br>anisokaryosis<br><br><sup>d</sup> | Nuclear atypia <sup>b, e</sup> | Macronucleolosis<br><br><sup>b</sup> | Bi-/trinucleated<br>cells<br>(multinucleated<br>giant cells) <sup>b</sup> | Inflammation<br><br><sup>d</sup> | Hemorrhages<br><br><sup>b</sup> | Hyperplasia<br><br><sup>d</sup> | Erosions<br>and/or<br>ulcers <sup>d</sup> |
|            |                              |                              |                              |                     |                                  |                                                          |                                |                                      |                                                                           |                                  |                                 |                                 |                                           |
|            |                              |                              |                              |                     |                                  |                                                          |                                |                                      |                                                                           |                                  |                                 |                                 |                                           |
| #1         | -                            | ++                           | 35 x 15                      | 12 µm               | +                                | +++                                                      | +                              | -                                    | -                                                                         | -                                | -                               | -                               | +++                                       |
| #2         | -                            | -                            | 42 x 15                      | 16 µm               | ++/+++                           | +++                                                      | +/+++                          | ++                                   | +/+++                                                                     | +                                | -                               | -                               | ++                                        |
| #3         | +/++                         | +/++                         | 30 x 18                      | 18 µm               | +                                | +++                                                      | ++                             | +                                    | +                                                                         | ++                               | +                               | ++                              | -                                         |
| #4         | -                            | +                            | 20 x 10                      | 15 µm               | +                                | ++                                                       | ++                             | +/+++                                | -                                                                         | +                                | -                               | +++                             | -                                         |
| #5         | -                            | -                            | 20 x 9                       | 12 µm               | -                                | ++                                                       | -                              | -                                    | -                                                                         | -                                | -                               | -                               | +++                                       |
| #6         | -                            | +                            | 40 x 15                      | 22 µm               | +                                | +++                                                      | ++/+++                         | -                                    | -                                                                         | +/+++                            | ++/+++                          | +                               | -                                         |

<sup>a</sup> In all cases, the majority of neoplastic cells was arranged in streams, loosely-compact interlacing bundles, whorls, and in a storiform pattern, with occasional areas characterized by increased cellularity and fascicular pattern.

<sup>b</sup> -, none; +, scant/occasional; ++, moderately abundant/numerous; +++, abundant/numerous

<sup>c</sup> Mitotic count ranged from 0 (cases 1, 4, and 5) to 1 (cases 2, 3, and 6) per 10 high power fields.

<sup>d</sup> +, low/mild; ++, moderate; +++, high/marked

<sup>e</sup> Defined as large, hyperchromatic nuclei with smudgy chromatin.

**Supplementary Table S4.** Main histochemical and immunohistochemical features of spindle cell neoplasms in goldfish (*Carassius auratus*) previously reported in the literature.

| Origin            | Histo- or cytotype  | IHC or HC                | Results<br>(color in HC)                 | References                       |
|-------------------|---------------------|--------------------------|------------------------------------------|----------------------------------|
| Vessels           | Haemangiopericytoma | anti- $\alpha$ -SMA      | ++                                       | Sirri <i>et al.</i> , 2016       |
|                   |                     | anti-desmin              | -                                        |                                  |
|                   |                     | anti-S100                | +                                        |                                  |
|                   |                     | anti-GFAP                | -                                        |                                  |
| Connective tissue | Myxoma              | Masson's trichrome-stain | NR                                       | Shokrpoor <i>et al.</i> , 2016   |
|                   |                     | Alcian blue (pH 2.5)     | Myxomatous stroma<br>(blue)              |                                  |
|                   |                     | PAS                      | Stroma and neoplastic cells<br>(magenta) |                                  |
|                   |                     | anti-desmin              | -                                        |                                  |
|                   | Fibroma             |                          | NR                                       | Constantino <i>et al.</i> , 1999 |
|                   |                     | Masson's trichrome-stain | Collagenous fibers<br>(blue)             | Shokrpoor <i>et al.</i> , 2016   |
|                   |                     | Alcian blue (pH 2.5)     | NR                                       |                                  |
|                   |                     | PAS                      | NR                                       |                                  |
|                   |                     | anti-desmin              | NR                                       |                                  |
|                   | Fibrosarcoma        | Masson's trichrome-stain | Interlacing collagen bundles<br>(blue)   | Rezaie <i>et al.</i> , 2017      |

Supplementary Table S4 cont

| Origin          | Histo- or cytotype | IHC or HC                | Results<br>(color in HC)                                          | References<br>(Reference number) |
|-----------------|--------------------|--------------------------|-------------------------------------------------------------------|----------------------------------|
| Pigmented cells | Chromatophoroma    | anti-PNL-2               | 2/3 cases: +<br>1/3 cases: -                                      | Siniard <i>et al.</i> , 2019     |
|                 |                    | anti-melan A             | 1/3 cases: +<br>2/3 cases: -                                      |                                  |
|                 |                    | anti-SOX10               | 3/3 cases: -                                                      |                                  |
|                 |                    |                          |                                                                   |                                  |
| Muscle          | Leiomyoma          | Masson's trichrome-stain | Tumor cells<br>(red)<br>Small amount of collagen fibers<br>(blue) | Oryan <i>et al.</i> , 2015       |
|                 |                    | anti-vimentin            | ++                                                                |                                  |
|                 |                    | anti-desmin              | ++                                                                |                                  |
|                 |                    | anti- $\alpha$ -SMA      | ++                                                                |                                  |
|                 |                    | anti-S100                | -                                                                 |                                  |



Supplementary Table S4 cont

| Origin                  | Histo- or cytotype                                         | IHC or HC                | Results<br><br>(color in HC)                            | References<br><br>(Reference number) |
|-------------------------|------------------------------------------------------------|--------------------------|---------------------------------------------------------|--------------------------------------|
| Peripheral nerve sheath | Schwannoma<br><br>(former neurilemoma)                     | anti-PCNA                | +                                                       | Sirri <i>et al.</i> , 2015           |
|                         |                                                            | anti-GFAP                | -                                                       |                                      |
|                         |                                                            |                          | ++                                                      |                                      |
|                         |                                                            | anti-S100                | ++                                                      | Marino <i>et al.</i> , 2007          |
|                         |                                                            | anti-calretinin          | ++                                                      |                                      |
|                         |                                                            | Orcein stain             | +                                                       |                                      |
|                         |                                                            |                          | (positive reticulin fibers encircling neoplastic cells) |                                      |
|                         |                                                            | Masson's trichrome-stain | Lack of collagen                                        |                                      |
|                         |                                                            | Trichrome stains         | Only occasional narrow collagen bundles                 |                                      |
|                         |                                                            | Silver stains            | Numerous reticulin fibers, rare neurites                |                                      |
|                         | Malignant Schwannoma<br><br>(former malignant neurilemoma) | Silver stains            | Lack of neurites                                        | Schlumberger <i>et al.</i> , 1952    |
|                         |                                                            | Reticulin stain          | Lack of encircling reticulin fibers                     |                                      |
|                         | Neurofibroma                                               | Silver stains            | Neurites were present                                   |                                      |
|                         | Pigmented nerve sheath tumors                              | n/a                      | n/a                                                     |                                      |

HC, histochemistry; IHC, immunohistochemistry; n/a, not applicable/applied; NR, not reported; -, neoplastic cells negative for the tested marker (= 0%); +, variable percentage of positive neoplastic cells (but still <100%); ++, neoplastic cells diffusely positive (= 100%)

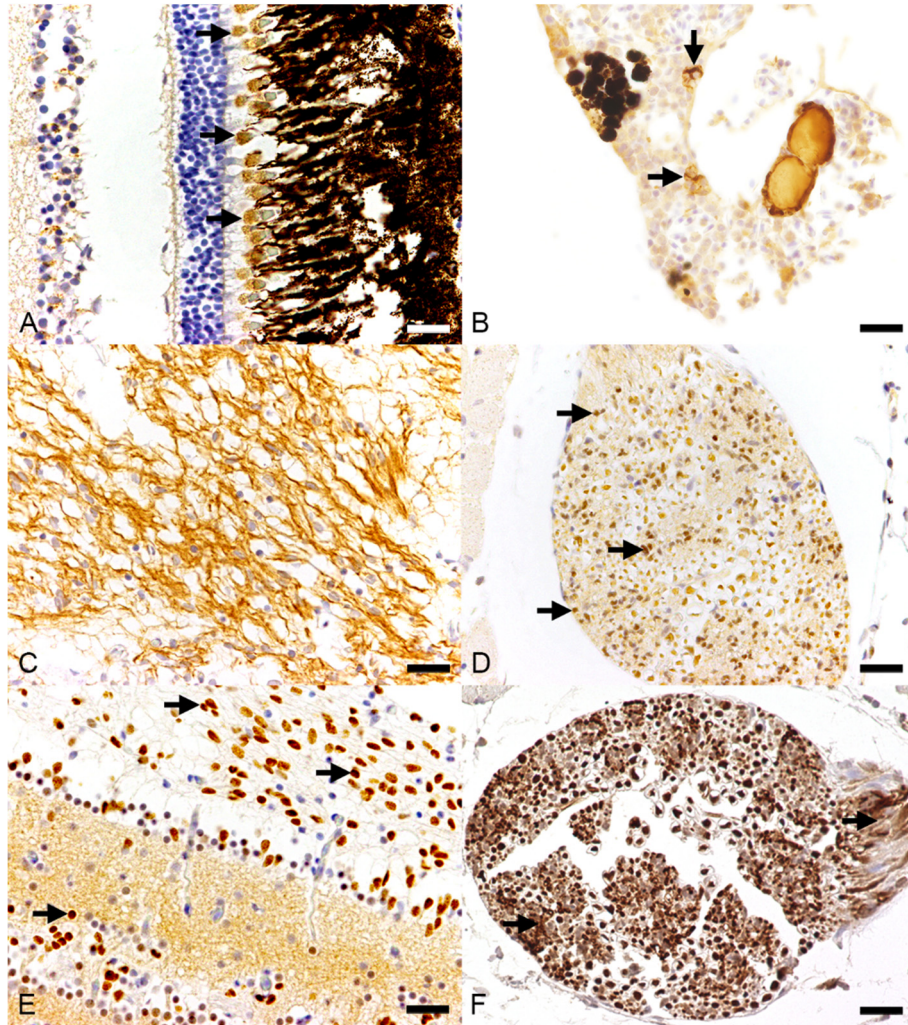

**Supplementary Figure S1:** Immunohistochemical (IHC) staining results in positive control tissues from a goldfish.
